# Supplementary material for: Effect of SARS-CoV-2 digital droplet RT-PCR assay sensitivity on COVID-19 wastewater based epidemiology
Source: bioRxiv or medRxiv preprint supplement (doi:10.1101/2022.04.17.22273949), 2022-04-18
Supplement: Supplementary file [file media-1.pdf]

1 **Effect of SARS-CoV-2 digital droplet RT-PCR assay sensitivity on COVID-19 wastewater**  
2 **based epidemiology - Supporting Information**

3  
4 Sooyeol Kim<sup>1</sup>, Marlene K. Wolfe<sup>2</sup>, Craig S. Criddle<sup>1</sup>, Dorothea H. Duong<sup>3</sup>, Vikram Chan-Herur<sup>3</sup>,  
5 Bradley J. White<sup>3</sup>, Alexandria B. Boehm<sup>1\*</sup>

6  
7 1. Dept of Civil and Environmental Engineering, Stanford University, Stanford, CA 94305, United  
8 States of America

9 2. Rollins School of Public Health, Emory University, Atlanta, GA, 30329, United States of  
10 America

11 3. Verily Life Sciences, South San Francisco, CA, 94080, United States of America

12

13 \* Corresponding author: [aboehm@stanford.edu](mailto:aboehm@stanford.edu)

14

15 This supporting information consists of 8 pages including 8 tables and 3 figures.

16

17 **Brief description of experimental methods**

18

19 Solids were dewatered and then a small mass was suspended in DNA/RNA Shield (Zymo  
20 Research, California) spiked with a known concentration of bovine coronavirus vaccine (BCoV,  
21 PBS Animal Health, Ohio, Calf-Guard Cattle Vaccine). The process of diluting the solid in the  
22 solution serves to alleviate inhibition<sup>1</sup>. The solution was then homogenized and then  
23 centrifuged. Subsequently, 10 replicate aliquots of the supernatant were subjected to nucleic  
24 acid extraction and inhibitor removal using commercial kits. The nucleic acids were used as a  
25 template in ddRT-PCR to measure the N gene of SARS-CoV-2, with each extraction replicate in  
26 its own well, consisting of a total of ten replicate wells for each sample. A 1:100 dilution of RNA  
27 extract was used as a template to measure BCoV, the spiked-in internal recovery control, and  
28 PMMoV, a fecal strength indicator and an endogenous internal recovery control, also run in 10  
29 replicate wells. Extraction negative controls, extraction positive controls, no-template controls  
30 (NTC), and PCR positive controls were run on each plate. PCR positive controls consisted of  
31 guide RNA (gRNA) of N gene of SARS-CoV-2 (ATCC VR-1986D) and double-stranded DNA  
32 gene blocks for BCoV and PMMoV (Integrated DNA Technologies, Iowa).

33

34 **Details on COVID-19 epidemiology data**

35

36 Earliest of reported symptom onset, laboratory result, or case record create dates for each  
37 sewershed was obtained from local or state sources. Case counts were georeferenced with  
38 residential addresses within the POTW service area. Incidence rate was calculated using the  
39 estimated population served by each POTW and a 7-day centered moving average was used in  
40 subsequent analysis.

41

42

43 Table S1. Details on publicly owned treatment work (POTW) and their sampling procedures:  
 44 average daily inflow in million gallons per day (MGD), population served by the sewershed, and  
 45 solid collection sampling point is shown.

| POTW  | Average Daily Inflow (MGD) | Population Served | Solid Collection                                                                               |
|-------|----------------------------|-------------------|------------------------------------------------------------------------------------------------|
| Dav   | 7.5                        | 66 600            | Primary Clarifier                                                                              |
| Gil   | 8.5                        | 110 300           | Settled solids collected from 24 hour composite raw influent using an Imhoff cone <sup>2</sup> |
| Ocean | 43                         | 250 000           | Primary Clarifier                                                                              |
| SJ    | 167                        | 1 458 000         | Primary Clarifier                                                                              |

46

47

48 Table S2. Summary of fraction of solid measured for samples from each POTW; the average

49 solid content was used to calculate the theoretical lower measurement limit.

| POTW    | Dav   | Gil   | Ocean | SJ    |
|---------|-------|-------|-------|-------|
| Min     | 0.108 | 0.048 | 0.147 | 0.171 |
| Average | 0.228 | 0.072 | 0.221 | 0.250 |
| Max     | 0.32  | 0.111 | 0.313 | 0.321 |

50

51  
52  
53  
54  
55

Table S3. Empirical relationship between log-transformed SARS-CoV-2 RNA N gene concentrations and laboratory-confirmed COVID-19 incidence rates using 10 merged wells; the error represents standard error for the calculated coefficients.

| <b>POTW</b> | <b>Intercept</b> | <b>Slope</b> | <b>R<sup>2</sup></b> | <b>p-Value</b>      |
|-------------|------------------|--------------|----------------------|---------------------|
| Dav         | -6.32 ± 0.16     | 0.50 ± 0.04  | 0.70                 | < 10 <sup>-15</sup> |
| Gil         | -7.26 ± 0.16     | 0.71 ± 0.03  | 0.84                 | < 10 <sup>-15</sup> |
| Ocean       | -7.11 ± 0.20     | 0.67 ± 0.05  | 0.72                 | < 10 <sup>-15</sup> |
| SJ          | -8.24 ± 0.16     | 0.88 ± 0.04  | 0.88                 | < 10 <sup>-15</sup> |
| All         | -7.02 ± 0.09     | 0.64 ± 0.02  | 0.75                 | < 10 <sup>-15</sup> |

56  
57  
58

59 Table S4. Theoretical lower measurement limit (units of cp/g dry weight) for each POTW  
 60 assuming the percent dry weight of dewatered solids was the average observed, 20 000  
 61 droplets generated per well for dd-RT-PCR, and 3 positive droplets across the merged wells.

| <b>Merged</b> | <b>Dav</b> | <b>Gil</b> | <b>Ocean</b> | <b>SJ</b> |
|---------------|------------|------------|--------------|-----------|
| 1             | 8200       | 24000      | 8500         | 7500      |
| 2             | 4100       | 12000      | 4300         | 3800      |
| 3             | 2700       | 8100       | 2800         | 2500      |
| 4             | 2100       | 6100       | 2100         | 1900      |
| 5             | 1600       | 4900       | 1700         | 1500      |
| 6             | 1400       | 4100       | 1400         | 1300      |
| 7             | 1200       | 3500       | 1200         | 1100      |
| 8             | 1000       | 3000       | 1100         | 940       |
| 9             | 920        | 2700       | 950          | 840       |
| 10            | 820        | 2400       | 850          | 750       |

62  
 63  
 64

65 Table S5. Measurable incidence lower limit calculated using empirical relationship derived from  
 66 Table S3 for each number of merged wells and range of observed incidence rate calculated  
 67 using theoretical lowest measurable concentration in Table S4 for each number of wells; the  
 68 error is calculated from the standard error of the fit.

|                                              | <b>Merged</b> | <b>Dav</b> | <b>Gil</b> | <b>Ocean</b> | <b>SJ</b>  |
|----------------------------------------------|---------------|------------|------------|--------------|------------|
| Incidence Lower Limit (#/100 000)            | 1             | 4.1 ± 0.3  | 6.9 ± 0.4  | 3.3 ± 0.3    | 1.6 ± 0.1  |
|                                              | 2             | 2.9 ± 0.2  | 4.2 ± 0.3  | 2.1 ± 0.2    | 0.8 ± 0.1  |
|                                              | 3             | 2.4 ± 0.2  | 3.2 ± 0.2  | 1.6 ± 0.2    | 0.6 ± 0.1  |
|                                              | 4             | 2.1 ± 0.2  | 2.6 ± 0.2  | 1.3 ± 0.2    | 0.5 ± 0.1  |
|                                              | 5             | 1.9 ± 0.2  | 2.2 ± 0.2  | 1.1 ± 0.1    | 0.4 ± 0.05 |
|                                              | 6             | 1.7 ± 0.2  | 1.9 ± 0.2  | 1.0 ± 0.1    | 0.3 ± 0.04 |
|                                              | 7             | 1.6 ± 0.2  | 1.7 ± 0.2  | 0.9 ± 0.1    | 0.3 ± 0.04 |
|                                              | 8             | 1.5 ± 0.2  | 1.6 ± 0.2  | 0.8 ± 0.1    | 0.2 ± 0.04 |
|                                              | 9             | 1.4 ± 0.2  | 1.5 ± 0.1  | 0.8 ± 0.1    | 0.2 ± 0.03 |
|                                              | 10            | 1.3 ± 0.2  | 1.4 ± 0.1  | 0.7 ± 0.1    | 0.2 ± 0.03 |
| Range of observed incidence rate (#/100 000) |               | 0 - 22     | 0.8 - 33   | 0.4 - 19     | 1.3 - 21   |

69  
 70  
 71

72 Table S6. Kendall's tau correlation between wastewater SARS-CoV-2 concentration and  
 73 incidence rate in each sewershed for the entire study period between June 1, 2021 and August  
 74 31, 2021.

|           | Dav  |                     | Gil  |                     | Ocean |                     | SJ   |                     |
|-----------|------|---------------------|------|---------------------|-------|---------------------|------|---------------------|
|           | Tau  | p-Value             | Tau  | p-Value             | Tau   | p-Value             | Tau  | p-Value             |
| <b>1</b>  | 0.62 | < 10 <sup>-14</sup> | 0.70 | < 10 <sup>-17</sup> | 0.57  | < 10 <sup>-11</sup> | 0.69 | < 10 <sup>-20</sup> |
| <b>2</b>  | 0.62 | < 10 <sup>-14</sup> | 0.72 | < 10 <sup>-19</sup> | 0.57  | < 10 <sup>-11</sup> | 0.70 | < 10 <sup>-21</sup> |
| <b>3</b>  | 0.63 | < 10 <sup>-15</sup> | 0.73 | < 10 <sup>-21</sup> | 0.58  | < 10 <sup>-12</sup> | 0.70 | < 10 <sup>-21</sup> |
| <b>4</b>  | 0.63 | < 10 <sup>-15</sup> | 0.74 | < 10 <sup>-22</sup> | 0.57  | < 10 <sup>-12</sup> | 0.70 | < 10 <sup>-21</sup> |
| <b>5</b>  | 0.63 | < 10 <sup>-15</sup> | 0.74 | < 10 <sup>-22</sup> | 0.57  | < 10 <sup>-12</sup> | 0.70 | < 10 <sup>-21</sup> |
| <b>6</b>  | 0.63 | < 10 <sup>-15</sup> | 0.74 | < 10 <sup>-22</sup> | 0.56  | < 10 <sup>-11</sup> | 0.70 | < 10 <sup>-21</sup> |
| <b>7</b>  | 0.63 | < 10 <sup>-15</sup> | 0.74 | < 10 <sup>-22</sup> | 0.55  | < 10 <sup>-11</sup> | 0.70 | < 10 <sup>-21</sup> |
| <b>8</b>  | 0.63 | < 10 <sup>-15</sup> | 0.74 | < 10 <sup>-21</sup> | 0.55  | < 10 <sup>-11</sup> | 0.70 | < 10 <sup>-21</sup> |
| <b>9</b>  | 0.63 | < 10 <sup>-15</sup> | 0.73 | < 10 <sup>-21</sup> | 0.55  | < 10 <sup>-11</sup> | 0.70 | < 10 <sup>-21</sup> |
| <b>10</b> | 0.63 | < 10 <sup>-15</sup> | 0.73 | < 10 <sup>-21</sup> | 0.56  | < 10 <sup>-11</sup> | 0.70 | < 10 <sup>-21</sup> |

75  
 76  
 77

78 Table S7. Kendall's tau correlation between wastewater SARS-CoV-2 concentration and  
 79 incidence rate in each sewershed during the low incidence month of June.

|           | Dav  |                    | Gil  |                    | Ocean |                    | SJ   |         |
|-----------|------|--------------------|------|--------------------|-------|--------------------|------|---------|
|           | Tau  | p-Value            | Tau  | p-Value            | Tau   | p-Value            | Tau  | p-Value |
| <b>1</b>  | 0.29 | 0.10               | 0.23 | 0.15               | 0.43  | < 10 <sup>-2</sup> | 0.13 | 0.32    |
| <b>2</b>  | 0.31 | 0.06               | 0.40 | < 10 <sup>-2</sup> | 0.44  | < 10 <sup>-2</sup> | 0.25 | 0.05    |
| <b>3</b>  | 0.37 | 0.02               | 0.48 | < 10 <sup>-3</sup> | 0.50  | < 10 <sup>-2</sup> | 0.23 | 0.08    |
| <b>4</b>  | 0.38 | 0.01               | 0.49 | < 10 <sup>-3</sup> | 0.46  | < 10 <sup>-2</sup> | 0.26 | 0.04    |
| <b>5</b>  | 0.36 | 0.02               | 0.50 | < 10 <sup>-3</sup> | 0.48  | < 10 <sup>-3</sup> | 0.25 | 0.05    |
| <b>6</b>  | 0.36 | 0.02               | 0.48 | < 10 <sup>-3</sup> | 0.37  | < 10 <sup>-2</sup> | 0.24 | 0.06    |
| <b>7</b>  | 0.38 | 0.01               | 0.48 | < 10 <sup>-3</sup> | 0.34  | 0.01               | 0.24 | 0.06    |
| <b>8</b>  | 0.38 | 0.01               | 0.44 | < 10 <sup>-2</sup> | 0.34  | 0.01               | 0.24 | 0.06    |
| <b>9</b>  | 0.38 | 0.01               | 0.43 | < 10 <sup>-2</sup> | 0.35  | 0.01               | 0.25 | 0.05    |
| <b>10</b> | 0.39 | < 10 <sup>-2</sup> | 0.44 | < 10 <sup>-2</sup> | 0.36  | < 10 <sup>-2</sup> | 0.24 | 0.06    |

80  
 81  
 82



83 Table S8. Logistic regression between true concentration and fraction detected out of 1000  
84 simulations for each measurement.

| <b>Merged</b> | <b>Intercept</b> | <b>Estimate</b>       | <b>p-value</b> |
|---------------|------------------|-----------------------|----------------|
| 1             | -2.10            | $1.93 \times 10^{-4}$ | $< 10^{-10}$   |
| 2             | -2.26            | $4.02 \times 10^{-4}$ | $< 10^{-9}$    |
| 3             | -1.85            | $5.07 \times 10^{-4}$ | $< 10^{-8}$    |
| 4             | -1.47            | $6.04 \times 10^{-4}$ | $< 10^{-6}$    |
| 5             | -1.27            | $7.68 \times 10^{-4}$ | $< 10^{-4}$    |
| 6             | -1.13            | $9.59 \times 10^{-4}$ | $< 10^{-3}$    |
| 7             | -1.11            | $1.24 \times 10^{-3}$ | $< 10^{-2}$    |
| 8             | -1.41            | $1.80 \times 10^{-3}$ | $< 10^{-2}$    |
| 9             | -2.33            | $3.02 \times 10^{-3}$ | $< 10^{-2}$    |
| 10            | -3.29            | $4.41 \times 10^{-3}$ | $< 10^{-2}$    |

85  
86

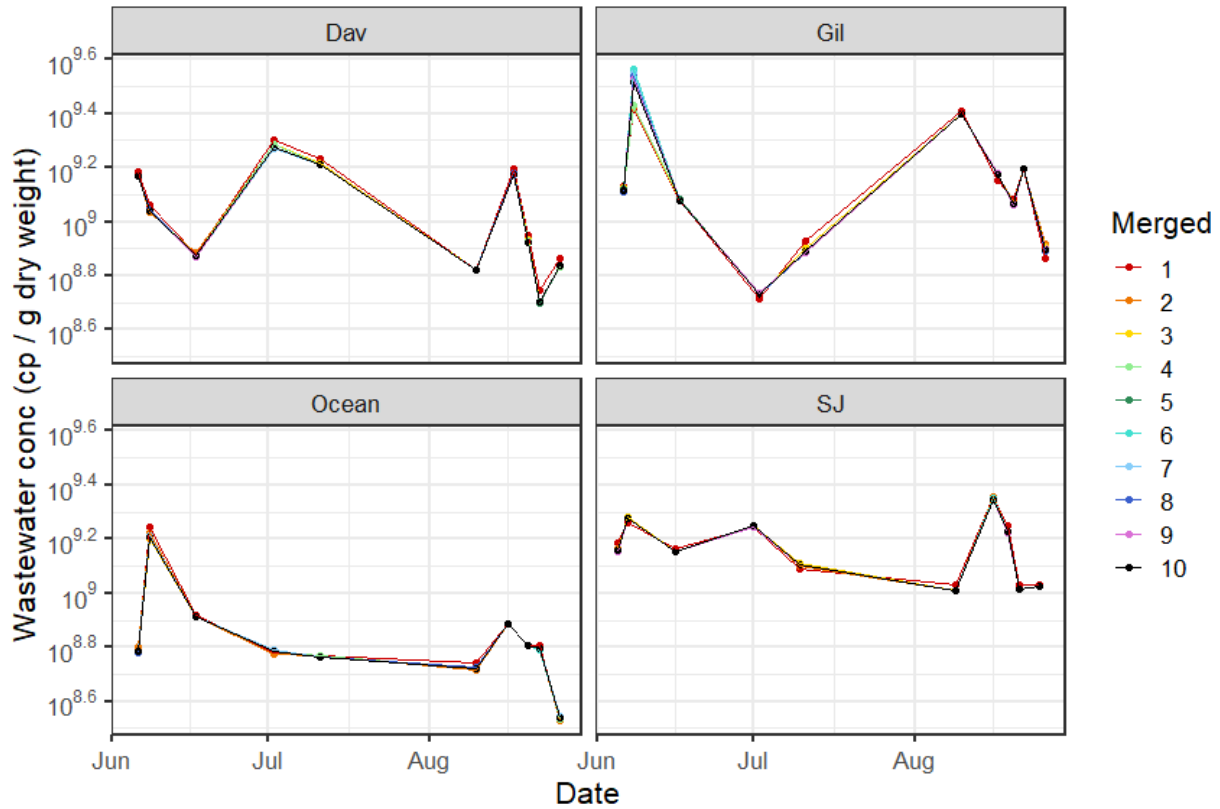

87  
 88 Figure S1. Time series of PMMoV concentration in wastewater solids (cp/g dry weight) from ten  
 89 randomly selected samples for each of the four POTWs from June 1, 2021 to August 31, 2021.  
 90

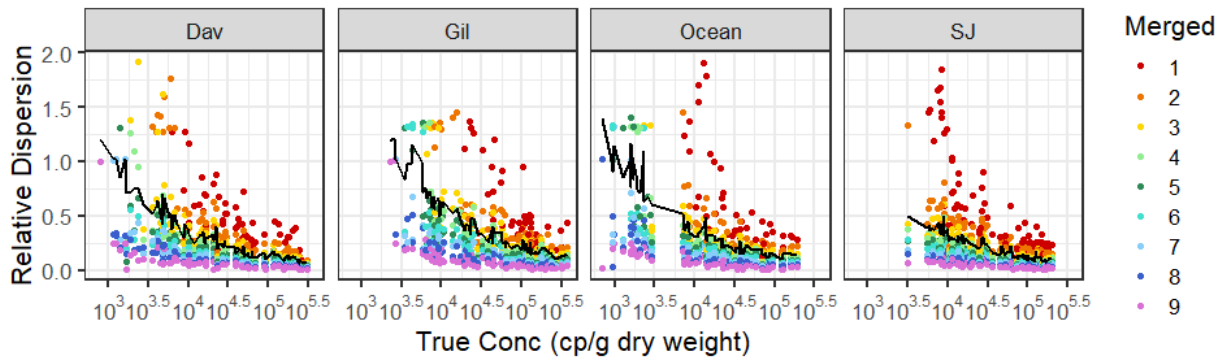

91  
 92 Figure S2. Relative dispersion (interquartile range normalized by median) of SARS-CoV-2 N  
 93 gene concentrations resulting from thousand simulations for each number of merged wells  
 94 plotted against true concentration, defined as concentration obtained from merging ten wells.

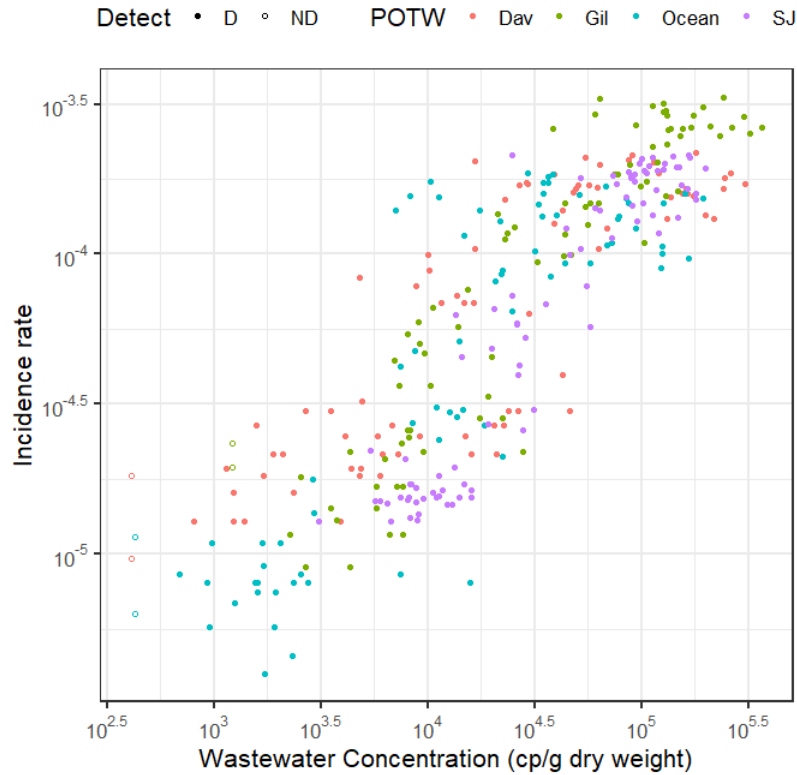

95

96

Figure S3. 7-day smoothed COVID-19 incidence rate plotted against SARS-CoV-2 concentration from merging ten wells.

97

98

99

### References

100

101

102

103

104

105

106

- (1) Huisman, J. S.; Scire, J.; Caduff, L.; Fernandez-Cassi, X.; Ganesanandamoorthy, P.; Kull, A.; Scheidegger, A.; Stachler, E.; Boehm, A. B.; Hughes, B.; Knudson, A.; Topol, A.; Wigginton, K. R.; Wolfe, M. K.; Kohn, T.; Ort, C.; Stadler, T.; Julian, T. R. Wastewater-Based Estimation of the Effective Reproductive Number of SARS-CoV-2. *Accept. Env. Health Perspect.* **2022**. <https://doi.org/10.1101/2021.04.29.21255961>.
- (2) United States Environmental Protection Agency. Method 160.5, Methods and Guidance for the Analysis of Water Version 2.0, 1999.
